# Supplementary material
Source: bioRxiv or medRxiv preprint supplement (http://biorxiv.org/highwire/filestream/28604/field_highwire_adjunct_files/0/100735-1.pdf)
Supplement: Supplementary file [file 100735-1.pdf]

**Table S1. RAG1/2-like copies in *P. flava* genomes.**

Dark blue color = complete RAG-like protein  
 Aqua color = RAG1/2-like in the same scaffold

RAG1x – RAG2x: Not phylogenetically assigned

| Genomics        |          |                         | RAG1-like                                    |       | RAG2-like |       |       |                             |                                                 |                                                                                                                                                                                                                                                                                                                                                                                                                  |                                                                                                                                                                                                                                                                                                                                                                                                                                                                                |  |
|-----------------|----------|-------------------------|----------------------------------------------|-------|-----------|-------|-------|-----------------------------|-------------------------------------------------|------------------------------------------------------------------------------------------------------------------------------------------------------------------------------------------------------------------------------------------------------------------------------------------------------------------------------------------------------------------------------------------------------------------|--------------------------------------------------------------------------------------------------------------------------------------------------------------------------------------------------------------------------------------------------------------------------------------------------------------------------------------------------------------------------------------------------------------------------------------------------------------------------------|--|
| Species         | Genomics | RAG ID                  | scaffold ID                                  | Start | End       | Start | End   | Structure                   | TSD Sequence                                    | TIR sequence                                                                                                                                                                                                                                                                                                                                                                                                     | Notes                                                                                                                                                                                                                                                                                                                                                                                                                                                                          |  |
| <i>P. flava</i> |          | RAG1A-like              | BCFJ01043787.1                               | 6511  | 7692      |       |       |                             |                                                 |                                                                                                                                                                                                                                                                                                                                                                                                                  | Pseudogene (stop codon)                                                                                                                                                                                                                                                                                                                                                                                                                                                        |  |
| <i>P. flava</i> |          | RAG1A-like              | BCFJ01026384.1                               | 8838  | 11546     |       |       |                             |                                                 |                                                                                                                                                                                                                                                                                                                                                                                                                  | Pseudogene (stop codon)                                                                                                                                                                                                                                                                                                                                                                                                                                                        |  |
| <i>P. flava</i> |          | RAG1A-like              | BCFJ01053939.1                               | 588   | 2285      |       |       |                             |                                                 |                                                                                                                                                                                                                                                                                                                                                                                                                  | Pseudogene (stop at the beginning of the contig)                                                                                                                                                                                                                                                                                                                                                                                                                               |  |
| <i>P. flava</i> |          | RAG1A-like              | BCFJ01053937.1                               | 155   | 415       |       |       |                             |                                                 |                                                                                                                                                                                                                                                                                                                                                                                                                  | Pseudogene (stop codon)                                                                                                                                                                                                                                                                                                                                                                                                                                                        |  |
| <i>P. flava</i> |          | RAG1A-like              | BCFJ01050366.1                               | 1104  | 1367      |       |       |                             |                                                 |                                                                                                                                                                                                                                                                                                                                                                                                                  | Pseudogene (stop codon)                                                                                                                                                                                                                                                                                                                                                                                                                                                        |  |
| <i>P. flava</i> |          | RAG1B1-like – RAG2B1-   | BCFJ01017854_/BCFJ01152714.1_BCFJ01052781.1* | 2256  | 4186      |       |       | TSD-5TIR-RAG1-RAG2-3TIR-TSD | >Pfl_B1_BCFJ01017854_BCFJ01052781<br>ccgCTGCGtg | >Pfl_B1_BCFJ01052781_3_71_bp<br>CAC---ATATCAATTACCGGTAACCGATAG----<br>CGAATCGTAAAAAATCAACATGGCCGCT<br>>Pfl_B_BCFJ01017854_5_71_bp<br>CACTTATAGAGCAGCTANGAGCGCCATTTG----<br>CTAATTATAAATTATAATGACTGTATGAT<br>>Pfl_B1_BCFJ01094280_3_71_bp<br>CACTTATATATCAATTACATGTAACCGATAG----<br>CAAATCGTAAAAAATCAAAATGGCCG<br>>Pfl_B1_BCFJ01094280_5_71_bp<br>CACCTTGGCAGCAGTANGAACCCATGTTG----<br>CTAATTATAAATAATTAATTAATTGA | *Note: RAG1B 1575-139 (BCFJ01152714.1) + 3-1918 (BCFJ01052781.1)                                                                                                                                                                                                                                                                                                                                                                                                               |  |
| <i>P. flava</i> |          | RAG1B1-like – RAG2B1-   | BCFJ01094280.1                               | 11811 | 10838     |       |       | TSD-5TIR-RAG1-RAG2-3TIR-TSD | >Pfl_B1_BCFJ01094280<br>gccCAATGtg              |                                                                                                                                                                                                                                                                                                                                                                                                                  | Pseudogene (stop codon)                                                                                                                                                                                                                                                                                                                                                                                                                                                        |  |
| <i>P. flava</i> |          | RAG1B1-like             | BCFJ01096996.1                               | 1529  | 3333      |       |       |                             |                                                 |                                                                                                                                                                                                                                                                                                                                                                                                                  | Pseudogene (stop codon)                                                                                                                                                                                                                                                                                                                                                                                                                                                        |  |
| <i>P. flava</i> |          | RAG2Bb-like             | BCFJ01034179.1                               |       |           | 9714  | 10894 |                             |                                                 |                                                                                                                                                                                                                                                                                                                                                                                                                  |                                                                                                                                                                                                                                                                                                                                                                                                                                                                                |  |
| <i>P. flava</i> |          | RAG2Bc-like             | BCFJ01293284.1                               |       |           | 2     | 562   |                             |                                                 |                                                                                                                                                                                                                                                                                                                                                                                                                  | Short Scaffold. Length: 697                                                                                                                                                                                                                                                                                                                                                                                                                                                    |  |
| <i>P. flava</i> |          | RAG2Bc-like             | BCFJ01291212.1                               |       |           | 2     | 220   |                             |                                                 |                                                                                                                                                                                                                                                                                                                                                                                                                  | Short Scaffold. Length: 221                                                                                                                                                                                                                                                                                                                                                                                                                                                    |  |
| <i>P. flava</i> |          | RAG1Bd-like – RAG2Bd-   | BCFJ01059137.1                               | 3484  | 5013      | 5496  | 7684  |                             |                                                 |                                                                                                                                                                                                                                                                                                                                                                                                                  | Pseudogene (stop codon)                                                                                                                                                                                                                                                                                                                                                                                                                                                        |  |
| <i>P. flava</i> |          | RAG1Bd-like             | BCFJ01067914.1                               | 9267  | 7317      |       |       |                             |                                                 |                                                                                                                                                                                                                                                                                                                                                                                                                  | Pseudogene (stop codon)                                                                                                                                                                                                                                                                                                                                                                                                                                                        |  |
| <i>P. flava</i> |          | RAG1Bd-like             | BCFJ01059136.1                               | 9896  | 9976      |       |       |                             |                                                 |                                                                                                                                                                                                                                                                                                                                                                                                                  |                                                                                                                                                                                                                                                                                                                                                                                                                                                                                |  |
| <i>P. flava</i> |          | RAG1Bd-like             | BCFJ01281385.1                               | 941   | 3         |       |       |                             |                                                 |                                                                                                                                                                                                                                                                                                                                                                                                                  | *Probably from RAG1H family (Query 100% & Ident 75%)                                                                                                                                                                                                                                                                                                                                                                                                                           |  |
| <i>P. flava</i> |          | RAG1x-like – RAG2x-like | BCFJ01006354.1                               | 6381  | 4010      | 3854  | 3016  |                             |                                                 |                                                                                                                                                                                                                                                                                                                                                                                                                  | Pseudogene (stop codon)                                                                                                                                                                                                                                                                                                                                                                                                                                                        |  |
| <i>P. flava</i> |          | RAG1B-like              | BCFJ01097859.1                               | 2644  | 4283      |       |       |                             |                                                 |                                                                                                                                                                                                                                                                                                                                                                                                                  | Pseudogene (stop codon)                                                                                                                                                                                                                                                                                                                                                                                                                                                        |  |
| <i>P. flava</i> |          | RAG1B-like              | BCFJ01065830.1                               | 27741 | 26621     |       |       |                             |                                                 |                                                                                                                                                                                                                                                                                                                                                                                                                  | Pseudogene (stop codon)                                                                                                                                                                                                                                                                                                                                                                                                                                                        |  |
| <i>P. flava</i> |          | RAG1B-like              | BCFJ01171729.1                               | 1474  | 200       |       |       |                             |                                                 |                                                                                                                                                                                                                                                                                                                                                                                                                  | Pseudogene (stop codon)                                                                                                                                                                                                                                                                                                                                                                                                                                                        |  |
| <i>P. flava</i> |          | RAG2B-like              | BCFJ01142432.1                               |       |           |       |       |                             |                                                 |                                                                                                                                                                                                                                                                                                                                                                                                                  |                                                                                                                                                                                                                                                                                                                                                                                                                                                                                |  |
| <i>P. flava</i> |          | RAG1C-like – RAG2C-like | BCFJ01036631.1                               | 888   | 10209     | 11187 | 14650 | TSD-5TIR-RAG1-RAG2-3TIR-TSD | >Pfl_C_BCFJ01036631<br>cacCATCCga               | >Pfl_C_BCFJ01036631_3_71_bp<br>CACATCGCATTGTACCTGATTAAACCATAGAA---ATATGCT<br>TTGTTTAGTTGCGG--GCAAAAT<br>>Pfl_C_BCFJ01036631_5_71_bp<br>CACATCGCATTCTCTTTAGAAAATTGGCTTG----<br>TTCAATTACGCCG                                                                                                                                                                                                                      | Intron vs Exon: With Spidey (DNA vs mRNA) we observe a single exon (Genomic coordinates 8334-10271 and mRNA coordinates 1-1937) with a length of 1937bases and a 99.2% of Ident: blastx.2 sequences: We find 3 introns ( Query 1 / Sbjct 888_ Query 215 / Sbjct 1532 - INTRON - Query 216 / Sbjct 6621_ Query 292 / Sbjct 6848 - INTRON - Query 293 / Sbjct 7552_ Query 348 / Sbjct 7716 - INTRON - Query 349 / Sbjct 8164_ Ouerv 1030 / Sbjct 10209) Pseudogene (stop codon). |  |
| <i>P. flava</i> |          | RAG1C-like              | BCFJ01041895.1                               | 5629  | 7445      |       |       |                             |                                                 |                                                                                                                                                                                                                                                                                                                                                                                                                  | Pseudogene (stop codon).                                                                                                                                                                                                                                                                                                                                                                                                                                                       |  |
| <i>P. flava</i> |          | RAG1C-like              | BCFJ01047137.1                               | 43    | 237       |       |       | TSD-5TIR-RAG1               | >Pfl_C_BCFJ01047137<br>gtgCATTG---              | >Pfl_C_BCFJ01047137_5_71_bp<br>TACATCGCATTCTCTTTAGAAAATTGCTTG----<br>TTCAATTACGCCGCGCATGCCCAACATTC                                                                                                                                                                                                                                                                                                               | Pseudogene (stop codon).                                                                                                                                                                                                                                                                                                                                                                                                                                                       |  |
| <i>P. flava</i> |          | RAG1C-like              | BCFJ01088492.1                               | 224   | 601       |       |       |                             |                                                 |                                                                                                                                                                                                                                                                                                                                                                                                                  |                                                                                                                                                                                                                                                                                                                                                                                                                                                                                |  |
| <i>P. flava</i> |          | RAG1C-like              | BCFJ01263664.1                               | 1296  | 994       |       |       |                             |                                                 |                                                                                                                                                                                                                                                                                                                                                                                                                  | Pseudogene (stop codon).                                                                                                                                                                                                                                                                                                                                                                                                                                                       |  |
| <i>P. flava</i> |          | RAG1C-like              | BCFJ01236165.1                               | 340   | 5         |       |       |                             |                                                 |                                                                                                                                                                                                                                                                                                                                                                                                                  |                                                                                                                                                                                                                                                                                                                                                                                                                                                                                |  |
| <i>P. flava</i> |          | RAG1C-like              | BCFJ01236166.1                               | 340   | 5         |       |       |                             |                                                 |                                                                                                                                                                                                                                                                                                                                                                                                                  |                                                                                                                                                                                                                                                                                                                                                                                                                                                                                |  |

| Species         | Transcript                      | RAG ID            | scaffold ID | RAG1  |      | RAG2  |     | Notes                                                                                                                                                                                                                                                                                                                    |
|-----------------|---------------------------------|-------------------|-------------|-------|------|-------|-----|--------------------------------------------------------------------------------------------------------------------------------------------------------------------------------------------------------------------------------------------------------------------------------------------------------------------------|
|                 |                                 |                   |             | Start | End  | Start | End |                                                                                                                                                                                                                                                                                                                          |
|                 |                                 |                   |             |       |      |       |     | Contig 2 gb GDGM01238338.1 + Length 996<br>gb GDGM01177394.1 + is in<br>gb GDGM01238538.1 +<br>gb GDGM01469753.1 + is in<br>gb GDGM01238538.1 +<br>gb GDGM01063948.1 + is in<br>gb GDGM01469753.1 +<br>gb GDGM01085983.1 + is in<br>gb GDGM01238538.1 +<br>Other transcripts:<br>gb GDGM01014902.1 <br>gb GDGM01481817.1 |
| <i>P. flava</i> | TRANSCRIP' RAG1A-like           |                   |             |       |      |       |     |                                                                                                                                                                                                                                                                                                                          |
| <i>P. flava</i> | TRANSCRIP' RAG1B-like (allele)  | gb GDGM01438088.1 |             | 87    | 3011 |       |     |                                                                                                                                                                                                                                                                                                                          |
| <i>P. flava</i> | TRANSCRIP' RAG2B-like (allele)* | gb GDGM01245220.1 |             |       | 325  | 2     |     | *RAG2B potential transcript. Length: 327                                                                                                                                                                                                                                                                                 |
| <i>P. flava</i> | TRANSCRIP' RAG2B-like (allele)* | gb GDGM01047156.1 |             |       | 205  | 20    |     | *RAG2B potential transcript. Length: 205                                                                                                                                                                                                                                                                                 |
|                 |                                 |                   |             |       |      |       |     | Contig 1<br>gb GDGM01081107.1 +<br>gb GDGM01504835.1 + is in<br>gb GDGM01081107.1 +                                                                                                                                                                                                                                      |
| <i>P. flava</i> | TRANSCRIP' RAG2Bc-like          |                   |             |       |      |       |     |                                                                                                                                                                                                                                                                                                                          |
| <i>P. flava</i> | TRANSCRIP' RAG1C-like (allele)* | gb GDGM01025609.1 |             | 2     | 1876 |       |     | *RAG1C potential transcript. Length: 1937                                                                                                                                                                                                                                                                                |
| <i>P. flava</i> | TRANSCRIP' RAG2C-like (allele)* | gb GDGM01097917.1 |             |       | 25   | 739   |     | *RAG2C potential transcript. Length: 1641                                                                                                                                                                                                                                                                                |
| <i>P. flava</i> | TRANSCRIP' RAG2E-like           | gb GDGM01150449.1 |             |       | 3    | 476   |     | Length: 528                                                                                                                                                                                                                                                                                                              |

Another RAG2-like transcript not analyzed with a 96% of Ident to BCFJ01127436.1 is **GDGM01229808.1**.

**Table S2. RAG1/2-like copies in *Echinarachnius parma* genomes.**

**Genomics**

We do not find WGS project

| <b>Transcripts</b> |                   |               |                    | RAG1-like    |            | RAG2-like    |            |                                                                                                                                                                                                                                                          |
|--------------------|-------------------|---------------|--------------------|--------------|------------|--------------|------------|----------------------------------------------------------------------------------------------------------------------------------------------------------------------------------------------------------------------------------------------------------|
| <b>Species</b>     | <b>Transcript</b> | <b>RAG ID</b> | <b>scaffold ID</b> | <b>Start</b> | <b>End</b> | <b>Start</b> | <b>End</b> | <b>Notes</b>                                                                                                                                                                                                                                             |
| <i>E. parma</i>    | TRANSCRIP         | RAG1B1-like   | Contig1            |              |            |              |            | <i>gi/638076396/gb/GAVF01032928.1/+</i><br><i>gi/638076394/gb/GAVF01032930.1/+</i> *                                                                                                                                                                     |
| <i>E. parma</i>    | TRANSCRIP         | RAG1B1-like   | GAVF01032929.1     | 1            | 789        |              |            | <i>Length: 840</i> *                                                                                                                                                                                                                                     |
| <i>E. parma</i>    | TRANSCRIP         | RAG1B1-like   | GAVF01009690.1     | 5            | 607        |              |            | <i>Length: 690</i> *                                                                                                                                                                                                                                     |
| <i>E. parma</i>    | TRANSCRIP         | RAG2B1-like   | Contig2            |              |            |              |            | <i>gi/638056455/gb/GAVF01052869.1/+</i><br><i>gi/638056452/gb/GAVF01052872.1/+ is in</i> *<br><i>gi/638056455/gb/GAVF01052869.1/+</i><br><i>gi/638056454/gb/GAVF01052870.1/+ is in</i><br><i>gi/638056455/gb/GAVF01052869.1/+</i><br><i>Length: 1255</i> |
| <i>E. parma</i>    | TRANSCRIP         | RAG2B1-like   | Contig1            |              |            |              |            | <i>gi/638056450/gb/GAVF01052874.1/+ gi/638056457/gb/GAVF01052867.1/+ gi/638056453/gb/GAVF01052871.1/+</i> *                                                                                                                                              |
| <i>E. parma</i>    | TRANSCRIP         | RAG2B1-like   | GAVF01015158.1     |              | 15         | 875          |            | <i>Length: 1195</i>                                                                                                                                                                                                                                      |

Transcript fragments for **RAG1-like** (**GAVF01077322.1** & **GAVF01077325.1**)

**RAG2-like** transcript fragments (**GAVF01052863.1** & **GAVF01015159.1**).

\*RAG1-like of *E. parma* are different from each other and they are part of the RAG1B1-like family.

\*RAG2-like of *E. parma* are different from each other and they are likely to be part of the RAG2B-like family.

**Table S3. RAG1/2-like copies in *Evechinus chloroticus* genomes.**

Dark blue color = complete RAG-like protein

**Genomics**

There is no WGS project

**Transcripts**

| Species               | Transcript | RAG ID      | scaffold ID    | RAG1-like |      | RAG2-like |      | Notes                                                                            |
|-----------------------|------------|-------------|----------------|-----------|------|-----------|------|----------------------------------------------------------------------------------|
|                       |            |             |                | Start     | End  | Start     | End  |                                                                                  |
| <i>E. chloroticus</i> | TRANSCRIP  | RAG1B2-like | GAPB01003278.1 | 596       | 2638 |           |      | <i>Length: 3050* Frame 2. Traduction positions 156-2637</i>                      |
| <i>E. chloroticus</i> | TRANSCRIP  | RAG1B2-like | GAPB01008000.1 | 324       | 1931 |           |      | <i>Length: 2875*</i>                                                             |
| <i>E. chloroticus</i> | TRANSCRIP  | RAG1B2-like | GAPB01020750.1 | 45        | 1340 |           |      | <i>Length: 1340*</i>                                                             |
| <i>E. chloroticus</i> | TRANSCRIP  | RAG1B2-like | GAPB01045749.1 |           |      |           |      |                                                                                  |
| <i>E. chloroticus</i> | TRANSCRIP  | RAG1B2-like | GAPB01022367.1 |           |      |           |      |                                                                                  |
| <i>E. chloroticus</i> | TRANSCRIP  | RAG2B2-like | Contig 1       |           |      |           |      | <i>gi/559439143/gb/GAPB01022632.1/+ *<br/>gi/559439142/gb/GAPB01022633.1/+ *</i> |
| <i>E. chloroticus</i> | TRANSCRIP  | RAG2B2-like | GAPB01063365.1 |           |      | 3293      | 2442 | <i>RAG2 potential transcriptn of NM_001033012.2. Length: 3383 *</i>              |

\*RAG1-like of *Evechinus chloroticus* are different from each other and they are likely to be part of the RAG1B2-like family.

\*RAG2-like of *Evechinus chloroticus* are different from each other and they are likely to be part of the RAG2B2-like family.

**Table S4. RAG1/2-like copies in *Strongylocentrotus purpuratus* genomes.**

Dark blue color = complete RAG-like protein  
 Aqua color = RAG1/2-like in the same scaffold

There are not included those with a Query cover <15% and a Ident <58%

RAG2x : Not phylogenetically assigned

| Genomics             | RAG ID                    | scaffold ID                        | RAG1-like |       | RAG2-like |       | End Notes                                                                                                                                                                                                                                                                          |
|----------------------|---------------------------|------------------------------------|-----------|-------|-----------|-------|------------------------------------------------------------------------------------------------------------------------------------------------------------------------------------------------------------------------------------------------------------------------------------|
|                      |                           |                                    | Start     | End   | Start     | End   |                                                                                                                                                                                                                                                                                    |
| <b>Species</b>       |                           |                                    |           |       |           |       |                                                                                                                                                                                                                                                                                    |
| <i>S. purpuratus</i> | RAG1B1-like - RAG2B1-like | AAGJ05119967.1                     | 11126     | 6070  | 2882      | 1120  | Pseudogene (stop codon at the end of RAG1-like). It correspond to RAG1/2-like published. Frame -3. Intron vs exon (see published article)Pseudogene (stop codon at the end of RAG1-like). It correspond to RAG1/2-like published. Frame -3. Intron vs exon (see published article) |
| <i>S. purpuratus</i> | RAG1B1-like               | AAGJ05093368.1                     | 2157      | 2628  |           |       | Pseudogene (stop codon)                                                                                                                                                                                                                                                            |
| <i>S. purpuratus</i> | RAG1B1-like               | AAGJ05091685.1                     | 19332     | 18460 |           |       |                                                                                                                                                                                                                                                                                    |
| <i>S. purpuratus</i> | RAG1B1-like               | AAGJ05093365.1                     | 22467     | 24496 |           |       | Pseudogene (stop codon)                                                                                                                                                                                                                                                            |
| <i>S. purpuratus</i> | RAG1B1-like               | AAGJ05093366.1                     | 6734      | 7481  |           |       |                                                                                                                                                                                                                                                                                    |
| <i>S. purpuratus</i> | RAG1B1-like               | AAGJ05107091.1                     | 2414      | 1759  |           |       |                                                                                                                                                                                                                                                                                    |
| <i>S. purpuratus</i> | RAG1B2-like               | AAGJ05052375.1 (3 Identical copie: | 665       | 9702  |           |       | Pseudogene (stop codon)                                                                                                                                                                                                                                                            |
| <i>S. purpuratus</i> | RAG1B2-like               | AAGJ05052374.1 (3 Identical copie: | 1336      | 2049  |           |       | Pseudogene (stop codon)                                                                                                                                                                                                                                                            |
| <i>S. purpuratus</i> | RAG1B2-like               | AAGJ05052370.1                     | 12342     | 18191 |           |       | Pseudogene (stop codon).                                                                                                                                                                                                                                                           |
| <i>S. purpuratus</i> | RAG1B2-like               | AAGJ05086369.1                     | 8733      | 10078 |           |       | Pseudogene (stop codon)                                                                                                                                                                                                                                                            |
| <i>S. purpuratus</i> | RAG2B1-like               | AAGJ05119965.1                     |           |       | 18311     | 18631 |                                                                                                                                                                                                                                                                                    |
| <i>S. purpuratus</i> | RAG2B1-like               | AAGJ05096689.1                     |           |       | 387       | 139   |                                                                                                                                                                                                                                                                                    |
| <i>S. purpuratus</i> | RAG2B1-like               | AAGJ05108197.1                     |           |       | 16407     | 15486 | Pseudogene (stop codon).                                                                                                                                                                                                                                                           |
| <i>S. purpuratus</i> | RAG2B1-like               | AAGJ05074252.1                     |           |       | 38623     | 43035 |                                                                                                                                                                                                                                                                                    |
| <i>S. purpuratus</i> | RAG2B-like                | AAGJ05085999.1                     |           |       | 7488      | 10283 | Cis-duplication                                                                                                                                                                                                                                                                    |
| <i>S. purpuratus</i> | RAG2x-like                | AAGJ05080929.1                     |           |       | 1003      | 596   | Pseudogene (stop codon). 4Th locus (Partial locus very damaged)                                                                                                                                                                                                                    |

## Transcripts

- **RAG2-like** paralog, with 80% identity (**JT103600.1** – Transcript of **AAGJ05108197.1** [RAG2B] in WGS database).
- A more divergent paralog with several stop codons (pseudogene) called RAG2B1-like (GAVU01006082.1– Transcript of **AAGJ05119967.1** [Query 97% & Ident 40%])
- Very close transcript sequences (**JT106157.1** & **GAVU01023365.1** – Transcripts of **AAGJ05119967.1** [Query 81% & Ident 95%] & [Query 100% & Ident 99%] respectively)
- Some fragments named (Contig1\_Rag2, GAVU01022021.1 – Both transcript fragment of **AAGJ05074252.1** [Query 100% & Ident 82%])

- **RAG1-like** close paralog (**Contig1\_RAG1**),

Divergent paralog named RAG1B2-like  
(GAVU01011698.1 – Partial transcript of  
AAGJ05052375.1. Intron vs exon: We can not predict  
the exon-intron structure because the genomic  
sequence it is not complete. Bad prediction.

- Fragments named (GAVU01024843.1 –Partial transcript of **AAGJ05107091.1** (Query 85% & Ident 87%);  
**GAVU01036260.1** – Partial transcript of **AAGJ05119967.1** (Query 25% & Ident 100%)  
**GAVU01022227.1** – Partial transcript of **AAGJ05116911.1** (Query 100% & Ident 100%) & **Contig2\_RAG1-like**)

### Notes:

Contig1\_RAG2-like= gi|374748692|gb|JT099428.1|-  
gb|GAVU01042378.1|+ is in Transcript fragment of **AAGJ05119967.1** (Query 81% & Ident 95%)  
gi|374748692|gb|JT099428.1|-

Contig1\_RAG1-like= gi|374755421|gb|JT106157.1|-  
gb|GAVU01015377.1|+ is in Transcripts of **AAGJ05119967.1** (Query 100% & Ident 87%)  
gi|374755421|gb|JT106157.1|-

Contig2\_RAG1-like= gb|GAVU01041231.1|+  
gi|374767377|gb|JT118113.1|+ Transcript fragment of **AAGJ05119967.1** (Query 100% & Ident 99%)  
Gb|GAVU01028205.1|+ is  
in gi|374767377|gb|JT118113.1|+

**Table S5. RAG1/2-like copies in *Paracentrotus lividus* genomes.**

RAG1x : Not phylogenetically assigned

**Genomics**

There is no WGS project

- Dark blue color = complete RAG-like protein
- Aqua color = RAG1/2-like in the same scaffold

**Transcripts fragments**

| Species           | Transcript                       | RAG ID                                     | scaffold ID     | Notes                                                                                                |
|-------------------|----------------------------------|--------------------------------------------|-----------------|------------------------------------------------------------------------------------------------------|
| <i>P. lividus</i> | TRANSCRIP' RAG1B1-like           |                                            | Contig1*        | gb GCZS01172032.1 -                                                                                  |
| <i>P. lividus</i> | TRANSCRIP' RAG1B2-like           |                                            | Contig2*        | gb GCZS01074202.1 + is in<br>gb GCZS01172032.1 -<br>gb GCZS01118857.1 +                              |
| <i>P. lividus</i> | TRANSCRIP' RAG1B2-like           |                                            | Contig3*        | gb GCZS01118856.1 + is in<br>gb GCZS01118857.1 +<br>gb GCZS01118856.1 + is in<br>gb GCZS01118857.1 + |
| <i>P. lividus</i> | TRANSCRIP' RAG1B2-like_RAG2B2-li | RAG1-like – RAG2-like (GCZS01045777.1)*    |                 | gb GCZS01045775.1 +                                                                                  |
| <i>P. lividus</i> | TRANSCRIP' RAG1B2-like_RAG2B2-li | RAG1-like – RAG2-like (GCZS01045775.1_RAG2 | Contig1-        | gb GCZS01045776.1 + is in<br>gb GCZS01045775.1 +                                                     |
| <i>P. lividus</i> | TRANSCRIP' RAG1B1-like           |                                            | Contig16*       | gb GCZS01055975.1 -<br>gb GCZS01009528.1 +                                                           |
| <i>P. lividus</i> | TRANSCRIP' RAG1B1-like           |                                            | GCZS01132703.1* |                                                                                                      |
| <i>P. lividus</i> | TRANSCRIP' RAG1B1-like           |                                            | GCZS01053115.1* |                                                                                                      |
| <i>P. lividus</i> | TRANSCRIP' RAG1B1-like           |                                            | Contig4*        | gb GCZS01085025.1 +                                                                                  |
| <i>P. lividus</i> | TRANSCRIP' RAG1B1-like           |                                            | GCZS01158909.1* | gb GCZS01085026.1 + is in                                                                            |
| <i>P. lividus</i> | TRANSCRIP' RAG1B1-like           |                                            | GCZS01150983.1* | gb GCZS01085025.1 +                                                                                  |

|                   |                        |                                 |                                                                                                                                                               |
|-------------------|------------------------|---------------------------------|---------------------------------------------------------------------------------------------------------------------------------------------------------------|
|                   |                        |                                 | <i>gb</i>  GCZS01064032.1 +                                                                                                                                   |
|                   |                        |                                 | <i>gb</i>  GCZS01035764.1 + is in<br><i>gb</i>  GCZS01064032.1 +                                                                                              |
| <i>P. lividus</i> | TRANSCRIP' RAG1-like   | Contig5_ <b>FRAGMENT</b>        |                                                                                                                                                               |
|                   |                        |                                 | <i>gb</i>  GCZS01064029.1 + is in<br><i>gb</i>  GCZS01064032.1 +<br><i>gb</i>  GCZS01064037.1 +<br><i>gb</i>  GCZS01078431.1 -                                |
| <i>P. lividus</i> | TRANSCRIP' RAG1-like   | GCZS01064034.1_ <b>FRAGMENT</b> |                                                                                                                                                               |
|                   |                        |                                 | <i>gb</i>  GCZS01185123.1 +<br><i>gb</i>  GCZS01096617.1 +<br><i>gb</i>  GCZS01184645.1 -<br>is in <i>gb</i>  GCZS01096617.1 +<br><i>gb</i>  GCZS01096621.1 + |
| <i>P. lividus</i> | TRANSCRIP' RAG1B2-like | Contig18_ <b>FRAGMENT</b>       |                                                                                                                                                               |
| <i>P. lividus</i> | TRANSCRIP' RAG1-like   | GCZS01118862.1_ <b>FRAGMENT</b> |                                                                                                                                                               |
| <i>P. lividus</i> | TRANSCRIP' RAG1-like   | GCZS01051899.1_ <b>FRAGMENT</b> |                                                                                                                                                               |
| <i>P. lividus</i> | TRANSCRIP' RAG1-like   | GCZS01112634.1_ <b>FRAGMENT</b> |                                                                                                                                                               |
| <i>P. lividus</i> | TRANSCRIP' RAG1-like   | GCZS01112632.1_ <b>FRAGMENT</b> |                                                                                                                                                               |
| <i>P. lividus</i> | TRANSCRIP' RAG1-like   | GCZS01087284.1_ <b>FRAGMENT</b> |                                                                                                                                                               |
| <i>P. lividus</i> | TRANSCRIP' RAG1-like   | GCZS01030082.1_ <b>FRAGMENT</b> |                                                                                                                                                               |
| <i>P. lividus</i> | TRANSCRIP' RAG1-like   | GCZS01042568.1_ <b>FRAGMENT</b> |                                                                                                                                                               |
| <i>P. lividus</i> | TRANSCRIP' RAG1-like   | GCZS01021545.1_ <b>FRAGMENT</b> |                                                                                                                                                               |
| <i>P. lividus</i> | TRANSCRIP' RAG1-like   | Contig6_ <b>FRAGMENT</b>        | <i>gb</i>  GCZS01006895.1 +<br><i>gb</i>  GCZS01032509.1 +                                                                                                    |
| <i>P. lividus</i> | TRANSCRIP' RAG1-like   | GCZS01044111.1_ <b>FRAGMENT</b> |                                                                                                                                                               |
|                   |                        |                                 | <i>gb</i>  GCZS01087285.1 +                                                                                                                                   |
| <i>P. lividus</i> | TRANSCRIP' RAG1-like   | Contig17_ <b>FRAGMENT</b>       | <i>gb</i>  GCZS01087291.1 + is in<br><i>gb</i>  GCZS01087285.1 +<br><i>gb</i>  GCZS01132331.1 +<br><i>gb</i>  GCZS01132329.1 +                                |
| <i>P. lividus</i> | TRANSCRIP' RAG1-like   | Contig7_ <b>FRAGMENT</b>        |                                                                                                                                                               |
| <i>P. lividus</i> | TRANSCRIP' RAG1-like   | GCZS01097940.1_ <b>FRAGMENT</b> |                                                                                                                                                               |
| <i>P. lividus</i> | TRANSCRIP' RAG1-like   | GCZS01089541.1_ <b>FRAGMENT</b> |                                                                                                                                                               |
| <i>P. lividus</i> | TRANSCRIP' RAG1-like   | GCZS01014750.1_ <b>FRAGMENT</b> |                                                                                                                                                               |



|                   |                        |                                 |                                                                                                                                |
|-------------------|------------------------|---------------------------------|--------------------------------------------------------------------------------------------------------------------------------|
| <i>P. lividus</i> | TRANSCRIP' RAG1-like   | GCZS01055973.1_ <b>FRAGMENT</b> |                                                                                                                                |
| <i>P. lividus</i> | TRANSCRIP' RAG1-like   | GCZS01096624.1_ <b>FRAGMENT</b> |                                                                                                                                |
| <i>P. lividus</i> | TRANSCRIP' RAG1-like   | GCZS01078430.1_ <b>FRAGMENT</b> | <i>gb</i> /GCZS01049902.1/+                                                                                                    |
| <i>P. lividus</i> | TRANSCRIP' RAG1-like   | Contig8_ <b>FRAGMENT</b>        | <i>gb</i> /GCZS01049901.1/+ is in<br><i>gb</i> /GCZS01049902.1/+<br><i>gb</i> /GCZS01049900.1/+                                |
| <i>P. lividus</i> | TRANSCRIP' RAG1-like   | GCZS01031833.1_ <b>FRAGMENT</b> | <i>gb</i> /GCZS01091464.1/+                                                                                                    |
| <i>P. lividus</i> | TRANSCRIP' RAG1-like   | Contig20_ <b>FRAGMENT</b>       | <i>gb</i> /GCZS01091461.1/+ is in<br><i>gb</i> /GCZS01091464.1/+<br><i>gb</i> /GCZS01091466.1/+                                |
| <i>P. lividus</i> | TRANSCRIP' RAG1-like   | Contig15_ <b>FRAGMENT</b>       | <i>gb</i> /GCZS01091463.1/+ is in<br><i>gb</i> /GCZS01091466.1/+<br><i>gb</i> /GCZS01019540.1/+<br><i>gb</i> /GCZS01019539.1/+ |
| <i>P. lividus</i> | TRANSCRIP' RAG1-like   | Contig10_ <b>FRAGMENT</b>       | <i>gb</i> /GCZS01091460.1/+<br><i>gb</i> /GCZS01091465.1/+                                                                     |
| <i>P. lividus</i> | TRANSCRIP' RAG1-like   | GCZS01077077.1_ <b>FRAGMENT</b> | <i>gb</i> /GCZS01077078.1/+                                                                                                    |
| <i>P. lividus</i> | TRANSCRIP' RAG1-like   | Contig9_ <b>FRAGMENT</b>        | <i>gb</i> /GCZS01077076.1/+ is in<br><i>gb</i> /GCZS01077078.1/+                                                               |
| <i>P. lividus</i> | TRANSCRIP' RAG1x-like  | GCZS01132704.1*                 |                                                                                                                                |
| <i>P. lividus</i> | TRANSCRIP' RAG1B2-like | Contig12*                       | <i>gb</i> /GCZS01013198.1/+<br><i>gb</i> /GCZS01013199.1/+<br><i>gb</i> /GCZS01033997.1/-                                      |
| <i>P. lividus</i> | TRANSCRIP' RAG1-like   | Contig11_ <b>FRAGMENT</b>       | <i>gb</i> /GCZS01152001.1/+ is in<br><i>gb</i> /GCZS01033997.1/-                                                               |

|                   |                        |                                 |                                                                                                |
|-------------------|------------------------|---------------------------------|------------------------------------------------------------------------------------------------|
| <i>P. lividus</i> | TRANSCRIP' RAG1-like   | Contig13_ <b>FRAGMENT</b>       | gb GCZS01064627.1 +<br>gb GCZS01064628.1 +                                                     |
| <i>P. lividus</i> | TRANSCRIP' RAG1-like   | Contig14_ <b>FRAGMENT</b>       | gb GCZS01064630.1 + is in<br>gb GCZS01064628.1 +<br>gb GCZS01149128.1 +<br>gb GCZS01019259.1 + |
| <i>P. lividus</i> | TRANSCRIP' RAG1-like   | GCZS01007361.1_ <b>FRAGMENT</b> |                                                                                                |
| <i>P. lividus</i> | TRANSCRIP' RAG1-like   | GCZS01170336.1_ <b>FRAGMENT</b> |                                                                                                |
| <i>P. lividus</i> | TRANSCRIP' RAG1-like   | GCZS01055974.1_ <b>FRAGMENT</b> |                                                                                                |
| <i>P. lividus</i> | TRANSCRIP' RAG1-like   | GCZS01052670.1_ <b>FRAGMENT</b> |                                                                                                |
| <i>P. lividus</i> | TRANSCRIP' RAG1-like   | GCZS01039677.1_ <b>FRAGMENT</b> |                                                                                                |
| <i>P. lividus</i> | TRANSCRIP' RAG1-like   | GCZS01026987.1_ <b>FRAGMENT</b> |                                                                                                |
| <i>P. lividus</i> | TRANSCRIP' RAG1-like   | GCZS01122106.1_ <b>FRAGMENT</b> |                                                                                                |
| <i>P. lividus</i> | TRANSCRIP' RAG1-like   | GCZS01087287.1_ <b>FRAGMENT</b> |                                                                                                |
| <i>P. lividus</i> | TRANSCRIP' RAG1-like   | GCZS01033022.1_ <b>FRAGMENT</b> |                                                                                                |
| <i>P. lividus</i> | TRANSCRIP' RAG1-like   | GCZS01057007.1_ <b>FRAGMENT</b> |                                                                                                |
| <i>P. lividus</i> | TRANSCRIP' RAG1-like   | GCZS01027952.1_ <b>FRAGMENT</b> |                                                                                                |
| <i>P. lividus</i> | TRANSCRIP' RAG1-like   | GCZS01174585.1_ <b>FRAGMENT</b> |                                                                                                |
| <i>P. lividus</i> | TRANSCRIP' RAG1x-like  | Contig19*                       | gb GCZS01072522.1 +<br>gb GCZS01072519.1 +                                                     |
| <i>P. lividus</i> | TRANSCRIP' RAG1-like   | GCZS01057812.1_ <b>FRAGMENT</b> |                                                                                                |
| <i>P. lividus</i> | TRANSCRIP' RAG1-like   | GCZS01156562.1_ <b>FRAGMENT</b> |                                                                                                |
| <i>P. lividus</i> | TRANSCRIP' RAG2B1-like | GCZS01182744.1*                 |                                                                                                |
| <i>P. lividus</i> | TRANSCRIP' RAG2B2-like | Contig2*                        | gb GCZS01031274.1 +<br>gb GCZS01031273.1 + is in<br>gb GCZS01031274.1 +                        |

\*RAG1-like of *P. lividus* are different from each other and they are likely to be part of the RAG1B1-like & RAG2B2-like families.

\*RAG2-like of *P. lividus* seems to have suffer a duplication (RAG2B1-like & RAG2B2-like).

**Table S6. RAG1/2-like copies in *Lytechinus variegatus* genomes.**

RAG2x : Not phylogenetically assigned

| Genomics                                                              |             |                | RAG1-like |       | RAG2-like |                          |
|-----------------------------------------------------------------------|-------------|----------------|-----------|-------|-----------|--------------------------|
| Species                                                               | RAG ID      | scaffold ID    | Start     | End   | Start     | End Notes                |
| There are included those with a Query cover >13%. Smallest Ident; 33% |             |                |           |       |           |                          |
| <i>L. variegatus</i>                                                  | RAG1B1-like | AGCV02054232.1 | 6377      | 9006  |           | Pseudogene (stop codon). |
| <i>L. variegatus</i>                                                  | RAG1B1-like | AGCV02411413.1 | 30469     | 23113 |           | Pseudogene (stop codon). |
| <i>L. variegatus</i>                                                  | RAG1B1-like | AGCV02253428.1 | 684       | 159   |           | Pseudogene (stop codon)  |
| <i>L. variegatus</i>                                                  | RAG1B-like  | AGCV02377058.1 | 2793      | 4091  |           | Pseudogene (stop codon)  |
| <i>L. variegatus</i>                                                  | RAG1B-like  | AGCV02060696.1 | 13096     | 11036 |           |                          |
| <i>L. variegatus</i>                                                  | RAG1B1-like | AGCV02009112.1 | 2792      | 3622  |           | Pseudogene (stop codon)  |
| <i>L. variegatus</i>                                                  | RAG1B-like  | AGCV02405259.1 | 1761      | 20426 |           | Pseudogene (stop codon)  |
| <i>L. variegatus</i>                                                  | RAG1B-like  | AGCV02139577.1 | 337       | 837   |           | Similar to RAG1F family  |
| <i>L. variegatus</i>                                                  | RAG1B1-like | AGCV02280906.1 | 495       | 1     |           | Pseudogene (stop codon)  |
| <i>L. variegatus</i>                                                  | RAG1B-like  | AGCV02064217.1 | 4585      | 5202  |           | Pseudogene (stop codon)  |
| <i>L. variegatus</i>                                                  | RAG1??-like | AGCV02077315.1 | 455       | 11    |           | Pseudogene (stop codon)  |
| <i>L. variegatus</i>                                                  | RAG1??-like | AGCV02050095.1 | 50        | 491   |           | Pseudogene (stop codon)  |
| <i>L. variegatus</i>                                                  | RAG2x-like  | AGCV02054233.1 |           |       | 2797      | 1952                     |
| <i>L. variegatus</i>                                                  | RAG2x-like  | AGCV02250166.1 |           |       | 734       | 1834                     |

### Transcripts

We can find very short **RAG1-like** transcripts (**GAUR01031317.1** – Partial transcript of **AGCV02009112.1**)

**Table S7. RAG1/2-like copies in *Eucidaris tribuloides* genomes.**

| Genomics                                                                 |                                               | RAG1-like       | RAG2-like   |       |      |       |     |                                                                                                                                                                                                                  |
|--------------------------------------------------------------------------|-----------------------------------------------|-----------------|-------------|-------|------|-------|-----|------------------------------------------------------------------------------------------------------------------------------------------------------------------------------------------------------------------|
| Species                                                                  | Genomics                                      | RAG ID          | scaffold ID | Start | End  | Start | End | Notes                                                                                                                                                                                                            |
|                                                                          | Dark blue color = complete RAG-like protein   |                 |             |       |      |       |     |                                                                                                                                                                                                                  |
|                                                                          | Aqua color = RAG1/2-like in the same scaffold |                 |             |       |      |       |     |                                                                                                                                                                                                                  |
| RAG1B2a-like = 2 <sup>nd</sup> duplication in RAG2B-locus in echinoderms |                                               |                 |             |       |      |       |     |                                                                                                                                                                                                                  |
| RAG2x-like : Not phylogenetically assigned                               |                                               |                 |             |       |      |       |     |                                                                                                                                                                                                                  |
| There are not included those with a Query cover <20% and a Ident <30%    |                                               |                 |             |       |      |       |     |                                                                                                                                                                                                                  |
| <i>E. tribuloides</i>                                                    | RAG1B1-like – RAG2B1-like                     | JZLH010201023.1 | 14471       | 10246 | 2995 | 7018  |     | RAG1-like blastx 2 sequences: Query1 / Subjct14486__Query62 / Subjct 14301 - INTRON - Query63 / Subjct13279__Query241/Subjct12743 - INTRON - Query242 / Subjct12039__Query840/Subjct10243 - RAG2-like:Pseudogene |
| <i>E. tribuloides</i>                                                    | RAG1B1-like                                   | JZLH010588349.1 | 14331       | 12831 |      |       |     | Pseudogene (stop codon).                                                                                                                                                                                         |
| <i>E. tribuloides</i>                                                    | RAG1B1-like                                   | JZLH010926899.1 | 4294        | 8170  |      |       |     | Pseudogene (stop codon).                                                                                                                                                                                         |
| <i>E. tribuloides</i>                                                    | RAG1B2-like – RAG2B2-like                     | JZLH010192588.1 | 13937       | 9563  | 3258 | 6615  |     | Pseudogene (stop codon).                                                                                                                                                                                         |
| <i>E. tribuloides</i>                                                    | RAG1B2-like                                   | JZLH010924454.1 | 5745        | 3014  |      |       |     | Pseudogene (stop codon)                                                                                                                                                                                          |
| <i>E. tribuloides</i>                                                    | RAG1B2-like                                   | JZLH010604796.1 | 992         | 10    |      |       |     | Pseudogene (stop codon).                                                                                                                                                                                         |
| <i>E. tribuloides</i>                                                    | RAG1B2-like                                   | JZLH010204041.1 | 1134        | 3739  |      |       |     | Pseudogene (stop codon).                                                                                                                                                                                         |
| <i>E. tribuloides</i>                                                    | RAG1B-like                                    | JZLH010029400.1 | 2894        | 927   |      |       |     |                                                                                                                                                                                                                  |
| <i>E. tribuloides</i>                                                    | RAG1B-like                                    | JZLH010807551.1 | 9475        | 8027  |      |       |     | Pseudogene (stop codon)                                                                                                                                                                                          |
| <i>E. tribuloides</i>                                                    | RAG1B-like                                    | JZLH010603647.1 | 21368       | 19904 |      |       |     | Pseudogene (stop codon).                                                                                                                                                                                         |
| <i>E. tribuloides</i>                                                    | RAG1B2a-like                                  | JZLH010134053.1 | 10199       | 8415  |      |       |     |                                                                                                                                                                                                                  |
| <i>E. tribuloides</i>                                                    | RAG1B2a-like                                  | JZLH010598024.1 | 7158        | 4750  |      |       |     | Pseudogene (stop codon).                                                                                                                                                                                         |
| <i>E. tribuloides</i>                                                    | RAG1B2a-like                                  | JZLH010877503.1 | 13693       | 15641 |      |       |     | Pseudogene (stop codon).                                                                                                                                                                                         |
| <i>E. tribuloides</i>                                                    | RAG1B2a-like                                  | JZLH010598025.1 | 2004        | 207   |      |       |     | Pseudogene (stop codon).                                                                                                                                                                                         |
| <i>E. tribuloides</i>                                                    | RAG1B2a-like                                  | JZLH010996576.1 | 4563        | 2869  |      |       |     | Pseudogene (stop codon)                                                                                                                                                                                          |
| <i>E. tribuloides</i>                                                    | RAG1B2-like                                   | JZLH010706307.1 | 7403        | 6484  |      |       |     | Pseudogene (stop codon)                                                                                                                                                                                          |
| <i>E. tribuloides</i>                                                    | RAG1B2-like                                   | JZLH010196803.1 | 21037       | 15964 |      |       |     | Pseudogene (stop codon)                                                                                                                                                                                          |
| <i>E. tribuloides</i>                                                    | RAG1B2-like                                   | JZLH010208141.1 | 607         | 1495  |      |       |     | Pseudogene (stop codon)                                                                                                                                                                                          |
| <i>E. tribuloides</i>                                                    | RAG1B2a-like                                  | JZLH010672642.1 | 700         | 62    |      |       |     |                                                                                                                                                                                                                  |
| <i>E. tribuloides</i>                                                    | RAG1B2a-like                                  | JZLH010402919.1 | 4850        | 3862  |      |       |     |                                                                                                                                                                                                                  |

|                       |                              |                 |       |       |       |       |                          |
|-----------------------|------------------------------|-----------------|-------|-------|-------|-------|--------------------------|
| <i>E. tribuloides</i> | RAG1B2a-like                 | JZLH010570475.1 | 11038 | 11899 |       |       |                          |
| <i>E. tribuloides</i> | RAG1B2a-like                 | JZLH010221689.1 | 3230  | 108   |       |       | Pseudogene (stop codon). |
| <i>E. tribuloides</i> | RAG1B2-like                  | JZLH010196804.1 | 7424  | 3632  |       |       |                          |
| <i>E. tribuloides</i> | Fragment                     | JZLH010939303.1 | 3589  | 8274  |       |       | Pseudogene (stop codon)  |
| <i>E. tribuloides</i> | RAG1B2-like                  | JZLH010095137.1 | 11504 | 10225 |       |       |                          |
| <i>E. tribuloides</i> | Fragment                     | JZLH011004596.1 | 10667 | 11554 |       |       |                          |
| <i>E. tribuloides</i> | Fragment                     | JZLH010900583.1 | 5058  | 4335  |       |       | Pseudogene (stop codon)  |
| <i>E. tribuloides</i> | Fragment                     | JZLH010294192.1 | 10561 | 11422 |       |       | Pseudogene (stop codon)  |
| <i>E. tribuloides</i> | Fragment                     | JZLH010900582.1 | 4994  | 4288  |       |       | Pseudogene (stop codon)  |
| <i>E. tribuloides</i> | Fragment                     | JZLH010098881.1 | 31285 | 29711 |       |       | Pseudogene (stop codon)  |
| <i>E. tribuloides</i> | RAG1-like_Fragment – RAG2-li | JZLH010790248.1 | 5310  | 3950  | 1049  | 837   | Pseudogene (stop codon)  |
| <i>E. tribuloides</i> | Fragment                     | JZLH010015240.1 | 7447  | 6926  |       |       | Pseudogene (stop codon). |
| <i>E. tribuloides</i> | RAG2B2-like                  | JZLH010009838.1 |       |       | 12398 | 11550 |                          |
| <i>E. tribuloides</i> | RAG2B2-like                  | JZLH010087786.1 |       |       | 25040 | 19648 | Pseudogene (stop codon). |
| <i>E. tribuloides</i> | RAG2B2-like                  | JZLH010464424.1 |       |       | 3701  | 7589  | Pseudogene (stop codon)  |
| <i>E. tribuloides</i> | RAG2x-like                   | JZLH010029397.1 |       |       | 6567  | 9709  |                          |
| <i>E. tribuloides</i> | Fragment                     | JZLH010089547.1 |       |       | 4092  | 3472  | Pseudogene (stop codon)  |
| <i>E. tribuloides</i> | Fragment                     | JZLH010921857.1 |       |       | 1601  | 1063  |                          |
| <i>E. tribuloides</i> | Fragment                     | JZLH010078708.1 |       |       | 12883 | 13301 | Pseudogene (stop codon)  |
| <i>E. tribuloides</i> | Fragment                     | JZLH010941783.1 |       |       | 1120  | 110   | Pseudogene (stop codon)  |

## Transcripts

We find only one transcript for RAG2-like (GAZP01042598.1)

RAG1-like RAG2-like

| Species               | Transcript | RAG ID    | scaffold ID    | Start | End | Start | End | Notes                                                                               |
|-----------------------|------------|-----------|----------------|-------|-----|-------|-----|-------------------------------------------------------------------------------------|
| <i>E. tribuloides</i> | TRANSCRIP  | RAG2-like | GAZP01042598.1 |       |     | 810   | 4   | Length: 914<br>Partial transcript of <i>JZLH010941783.1</i> (Query 97% & Ident 70%) |

**Table S8. RAG1/2-like copies in *Ophiothrix spiculata* genomes.**

Aqua color = RAG1/2-like in the same scaffold

**Genomics**

| Species                                                               | RAG ID                          | scaffold ID    | RAG1-like |       | RAG2-like |      | Notes                    |
|-----------------------------------------------------------------------|---------------------------------|----------------|-----------|-------|-----------|------|--------------------------|
|                                                                       |                                 |                | Start     | End   | Start     | End  |                          |
| RAG1x : Not phylogenetically assigned                                 |                                 |                |           |       |           |      |                          |
| There are included those with a Query cover >14%. Smallest Ident; 30% |                                 |                |           |       |           |      |                          |
| <i>O. spiculata</i>                                                   | RAG1B-like (1) – RAG2B-like (1) | JXSR01321259.1 | 6431      | 8453  | 8640      | 9326 |                          |
| <i>O. spiculata</i>                                                   | RAG1B-like (1)                  | JXSR01137909.1 | 3884      | 2097  |           |      |                          |
| <i>O. spiculata</i>                                                   | RAG1B-like (1)                  | JXSR01509747.1 | 1802      | 2543  |           |      |                          |
| <i>O. spiculata</i>                                                   | RAG1B-like (1)                  | JXSR01424580.1 | 1074      | 2029  |           |      | Pseudogene (stop codon)  |
| <i>O. spiculata</i>                                                   | RAG1B-like (1)                  | JXSR01174233.1 | 12379     | 7877  |           |      | Pseudogene (stop codon). |
| <i>O. spiculata</i>                                                   | RAG1x2-like                     | JXSR01257084.1 | 3067      | 4401  |           |      |                          |
| <i>O. spiculata</i>                                                   | RAG1x1-like                     | JXSR01326072.1 | 112       | 1260  |           |      |                          |
| <i>O. spiculata</i>                                                   | RAG1x1-like                     | JXSR01313620.1 | 9747      | 11432 |           |      |                          |
| <i>O. spiculata</i>                                                   | RAG1x3-like                     | JXSR01590818.1 | 7864      | 8317  |           |      | Pseudogene (stop codon)  |
| <i>O. spiculata</i>                                                   | RAG1B-like (2)                  | JXSR01445370.1 | 2127      | 2672  |           |      |                          |

**Transcripts**

We do not find any TSA project

### Table S9. RAG1/2-like copies in *Henricia* sp. AR-2014 genomes.

RAG2x-like : Not phylogenetically assigned

#### Genomics

There is no WGS project

#### Transcripts

|                     |            |            |                | RAG1-like |      | RAG2-like |      |                       |
|---------------------|------------|------------|----------------|-----------|------|-----------|------|-----------------------|
| Species             | Transcript | RAG ID     | scaffold ID    | Start     | End  | Start     | End  | Notes                 |
| <i>Henricia</i> sp. | TRANSCRIP  | RAG1B-like | GAVP01020485.1 | 26        | 1450 |           |      | <i>Length: 1460</i> * |
| <i>Henricia</i> sp. | TRANSCRIP  | RAG2x-like | GAVP01027111.1 |           |      | 194       | 1009 | <i>Length: 1023</i> * |

Transcript fragments for RAG1-like (**GAVP01020484.1\***, **GAVP01036659.1**, GAVP01036658.1 & **GAVP01083962.1\***)

\*RAG1-like of *Henricia* sp. are similar to each other (no CAP)

\*RAG2-like of *Henricia* sp. can not be classify easily in a family.

## Table S10. *RAG1/2-like* copies in *Echinaster spinulosus* genomes.

RAG1x-RAG2x like : Not phylogenetically assigned

### Genomics

There is no WGS project

### Transcripts

We find a significant transcript result for **RAG2x-like (Contig1\*)** and a small fragment (**GAVE01094595.1\***).

Also we find some transcript fragments for **RAG1x-like (GAVE01108867.1, GAVE01016803.1, GAVE01014984.1\* & GAVE01004389.1)**

| Species              | Transcript           | RAG ID | scaffold ID | Notes                                      |
|----------------------|----------------------|--------|-------------|--------------------------------------------|
|                      |                      |        |             | <i>Other transcripts:</i>                  |
|                      |                      |        |             | <i>Contig1_RAG2 :</i>                      |
|                      |                      |        |             | <i>gi 637915705 gb GAVE01094586.1 +</i>    |
|                      |                      |        |             | <i>gi 637915714 gb GAVE01094577.1 + is</i> |
|                      |                      |        |             | <i>in gi 637915705 gb GAVE01094586.1 +</i> |
|                      |                      |        |             | <i>gi 637915708 gb GAVE01094583.1 +</i>    |
|                      |                      |        |             | <i>gi 637915709 gb GAVE01094582.1 +</i>    |
| <i>E. spinulosus</i> | TRANSCRIPT RAG2-like |        |             | <i>gi 637915718 gb GAVE01094573.1 + is</i> |
|                      |                      |        |             | <i>in gi 637915709 gb GAVE01094582.1 +</i> |
|                      |                      |        |             | <i>gi 637915712 gb GAVE01094579.1 + is</i> |
|                      |                      |        |             | <i>in gi 637915718 gb GAVE01094573.1 +</i> |
|                      |                      |        |             | <i>gi 637915719 gb GAVE01094572.1 + is</i> |
|                      |                      |        |             | <i>in gi 637915709 gb GAVE01094582.1 +</i> |
|                      |                      |        |             | <i>gi 637915710 gb GAVE01094581.1 +</i>    |

\*RAG2-like of *E. spinulosus* are similar from each other (no CAP)

\*RAG1-like of *E. spinulosus*. can not be classify easily in a family.



**Table S11. RAG1/2-like copies in *Asterias forbesi* genomes.**

Dark blue color = complete RAG-like protein

**Genomics**

There is no WGS project

**Transcripts**

| Species           | Transcript              | RAG ID | scaffold ID    | RAG1-like |     | RAG2-like |     | Notes               |
|-------------------|-------------------------|--------|----------------|-----------|-----|-----------|-----|---------------------|
|                   |                         |        |                | Start     | End | Start     | End |                     |
| <i>A. forbesi</i> | TRANSCRIPT RAG1B2-like* |        | GAUS01036390.1 | 2643      | 115 |           |     | <i>Length: 2943</i> |
| <i>A. forbesi</i> | TRANSCRIPT RAG1B2-like* |        | GAUS01036391.1 | 2040      | 118 |           |     | <i>Length: 5072</i> |
| <i>A. forbesi</i> | TRANSCRIPT RAG2B2-like  |        | GAUS01036395.1 |           |     | 1072      | 230 | <i>Length: 1755</i> |

*mRNA  
Traduction  
Reverse  
frame 1.  
Position:  
300-2832*

\*RAG1-like of *A. forbesi*.is likely to be part of the RAG1B2-like family.

\*RAG2-like of *A. forbesi*.is likely to be part of the RAG2B2-like family.

**Table S12. RAG1/2-like copies in *Patiria miniata* genomes.**

| Genomics                                                              |             | RAG1-like      |       | RAG2-like |       | Structure | TSD Sequence           | TIR Sequence                                                                                                                                                                                                                | Notes                                                                                     |
|-----------------------------------------------------------------------|-------------|----------------|-------|-----------|-------|-----------|------------------------|-----------------------------------------------------------------------------------------------------------------------------------------------------------------------------------------------------------------------------|-------------------------------------------------------------------------------------------|
| Species                                                               | RAG ID      | scaffold ID    | Start | End       | Start |           |                        |                                                                                                                                                                                                                             |                                                                                           |
| There are included those with a Query cover >20%. Smallest Ident. 34% |             |                |       |           |       |           |                        |                                                                                                                                                                                                                             |                                                                                           |
| <i>P. miniata</i>                                                     | RAG1B2-like | JH771625.1     | 459   | 2171      |       |           | TSD-5TIR-RAG1-3TIR-TSD | >Pmi_JH771625_5_71_bp<br>CACAGCGAAAAATGCCTTACAT<br>GAATTGACA----<br>CGGAGCGGCCTTGAGAGGGCG<br>GCACAGCT<br>>Pmi_JH771625_3_71_bp<br>---TTCAGcaa<br>CACAGCGAAAAATCCCCATTG<br>GTAGTGTA----<br>CACGGATGGAACAGTGCCGTG<br>GGCAGACA | Alternative name<br>AKZP01053172.1 in<br>the NCBI database.                               |
| <i>P. miniata</i>                                                     | RAG1B2-like | JH769343.1     | 3828  | 5535      |       |           | TSD-5TIR-RAG1          | >Pmi_JH769343_5_71_bp<br>CACAGTGAAAAATGCCTTANAT<br>AAATTGGCA----<br>gagTTTAG---<br>CGGAGCGGCCGGTAGAGGGC<br>GGCACAGCC                                                                                                        | Alternative name<br>AKZP01019636.1 in<br>the NCBI database.<br>Pseudogene (stop<br>codon) |
| <i>P. miniata</i>                                                     | RAG1B2-like | AKZP01053171.1 | 3445  | 4824      |       |           |                        |                                                                                                                                                                                                                             | Alternative name<br>JH771625.1 in<br>Echinobase.<br>Pseudogene (stop<br>codon).           |
| <i>P. miniata</i>                                                     | RAG1B2-like | JH769405.1     | 5927  | 4209      |       |           |                        |                                                                                                                                                                                                                             | Alternative name<br>AKZP01020859.1 in<br>the NCBI database.<br>Pseudogene (stop<br>codon) |
| <i>P. miniata</i>                                                     | RAG1B2-like | JH780581.1     | 4440  | 3176      |       |           |                        |                                                                                                                                                                                                                             | Alternative name<br>AKZP01114579.1 in<br>the NCBI database.                               |
| <i>P. miniata</i>                                                     | RAG1-like   | JH775991.1     | 1186  | 839       |       |           | RAG1-3TIR              | >Pmi_AKZP01172991_3_71_bp<br>CACAGCGAAAAATCCCCATTG<br>GCCGTGTAA----<br>CACGGATGGGAATGGGGCGT<br>GGCGGACA                                                                                                                     | Alternative name<br>AKZP01090827.1 in<br>the NCBI database                                |

---

There are included those with a Query cover >20%.

---

*P. miniata* RAG2B2-like JH772703.1 1031 3195

### Transcripts - NR database

We can find a short **RAG1-like** transcripts (**GAWB01010448.1** – partial and short transcript of *JH771625.1* (Query 100% & Ident 96%) or AKZP01019636.1 [Query 100% & Ident 80%]).

## **Table S13. *RAG1/2-like* copies in *Patiria pectinifera* genomes.**

### **Genomics**

There is no WGS project

### **Transcripts**

We find transcript fragments in **RAG1B1-like (GAVT01102981.1\*)** and **RAG2B2-like (Contig2 & Contig1)**

\*RAG1-like of *P. pectinifera*. is part of the RAG1B1-like family.

Note:

Contig1\_RAG2-like= gb|GAVT01098600.1|-  
gi|638542668|gb|GAVK01108580.1|+ is in gb|GAVT01098600.1|-

Contig2\_RAG2-like= gb|GAVT01012421.1|+  
gi|638541702|gb|GAVK01109546.1|+

**Table S14. *RAG1/2-like* copies in *Saccoglossus kowalevskii* genomes.**

**Genomics**

We do not find significant results (NS)

**Transcripts**

We do not find any TSA project

**Table S15. *RAG1/2-like* copies in *Anneissia japonica* genomes.**

**Genomics**

We do not find WGS project

**Transcripts**

We do not find significant transcript results.

**Table S16. *RAG1/2-like* copies in *Psathyrometra fragilis* genomes.**

**Genomics**

We do not find WGS project

**Transcripts**

We do not find significant transcript results.

**Table S17. *RAG1/2-like* copies in *Abyssocucumis albatrossi* genomes.**

**Genomics**

We do not find WGS project

**Transcripts**

We do not find significant transcript results.

**Table S18. *RAG1/2-like* copies in *Sclerodactyla briareus* genomes.**

**Genomics**

We do not find WGS project

**Transcripts**

We do not find significant transcript results.

### **Table S19. *RAG1/2-like* copies in *Apostichopus japonicus* genomes.**

#### **Genomics**

We do not find WGS project

#### **Transcripts**

We do not find significant transcript results.

### **Table S20. *RAG1/2-like* copies in *Parastichopus parvimensis* genomes.**

#### **Genomics**

We do not find significant results (NS)

#### **Transcripts**

We do not find any TSA project

### **Table S21. *RAG1/2-like* copies in *Parastichopus californicus* genomes.**

#### **Genomics**

We do not find WGS project

#### **Transcripts**

We do not find significant transcript results.

### **Table S22. *RAG1/2-like* copies in *Sphaerechinus granularis* genomes.**

RAG1x – RAG2x : Not phylogenetically assigned

#### **Genomics**

There is no WGS project

#### **Transcripts**

| Species              | Transcript | RAG ID     | scaffold ID    | RAG1-like |      | RAG2-like |              | End Notes |
|----------------------|------------|------------|----------------|-----------|------|-----------|--------------|-----------|
|                      |            |            |                | Start     | End  | Start     | End          |           |
| <i>S. granularis</i> | TRANSCRIP  | RAG2x-like | GAVR01037695.1 |           | 1597 | 755       | Length: 1668 |           |

Transcript fragments for **RAG1-like** (GAVP01036659.1, GAVR01070653.1, GAVR01070662.1, GAVR01070656.1, GAVR01070663.1, GAVR01023727.1, GAVR01049989.1, GAVR01049990.1, GAVR01090577.1)

Transcript fragment for **RAG2-like** (GAVR01004062.1).

**Table S23. *RAG1/2-like* copies in *Arbacia punctulata* genomes.**

**Genomics**

There is no WGS project

**Transcripts**

We do not find significant transcript results.

**Table S24. *RAG1/2-like* copies in *Ophiocoma echinata* genomes.**

**Genomics**

There is no WGS project

**Transcripts**

Transcript fragments in RAG2-like (**GAUQ01068411.1**)

Transcript fragments for RAG1-like (**GAUQ01034189.1\***, **GAUQ01007173.1\*** & **Contig1**)

\* There are too small to be classified. Both RAG1-like are the same.

Contig 1  
gi|637410677|  
gb|GAUQ01  
058697.1|+  
gi|637410679|  
gb|GAUQ01  
058696.1|+

**Table S25. *RAG1/2-like* copies in *Peribolaster folliculatus* genomes.**

**Genomics**

There is no WGS project

**Transcripts**

We do not find significant transcript results.

**Table S26. *RAG1/2-like* copies in *Leptasterias sp. AR-2014* genomes.**

RAG1x : Not phylogenetically assigned

**Genomics**

There is no WGS project

**Transcripts**

We find significant transcript results for RAG2B2-like (**GAVC01001406.1**)

Transcript fragments for RAG1x-like (**Contig1**)

Contig1

gi|638922399|  
gb|GAVC01  
066306.1|+  
gi|638922403|  
gb|GAVC01  
066303.1|+

\*RAG2-like of *Leptasterias sp.* is likely to be part of the RAG2B2-like family.

**Table S27. *RAG1/2-like* copies in *Pisaster ochraceus* genomes.**

**Genomics**

There is no WGS project

**Transcripts**

*We do not find significant results (NS)*

**Table S28. *RAG1/2-like* copies in *Marthasterias glacialis* genomes.**

**Genomics**

There is no WGS project

**Transcripts**

*We do not find significant results (NS)*

**Table S29. *RAG1/2-like* copies in *Asterias rubens* genomes.**

**Genomics**

There is no WGS project

**Transcripts**

*We do not find significant results (NS)*

**Table S30. *RAG1/2-like* copies in *Asterias amurensis* genomes.**

**Genomics**

There is no WGS project

**Transcripts**

We find transcript fragments in **RAG2B2-like(GAVL01057092.1)** and **RAG1-like(GAVL01012549.1\_not significant[NS])**

**Table S31. *RAG1/2-like* copies in *Luidia clathrata* genomes.**

**Genomics**

There is no WGS project

**Transcripts**

*We do not find significant results (NS)*



**Table S32. *RAG1/2-like* copies in *Acanthaster planci* genomes.**

**Genomics**

*We do not find significant results (NS)*

**Transcripts**

*We do not find significant results (NS)*
